# Supplementary material
Source: MDPI journal article supplement (https://www.mdpi.com/2076-3417/11/20/9414)
Supplement: s1 [file s1 › applsci-1392718-supplementary.pdf]

# Supplementary Materials: Very Fast RP–UHPLC–PDA Method for Identification and Quantification of the Cannabinoids from Hemp Oil

Nicoleta Mirela Blebea, Dan Rambu, Teodor Costache, and Simona Negreș

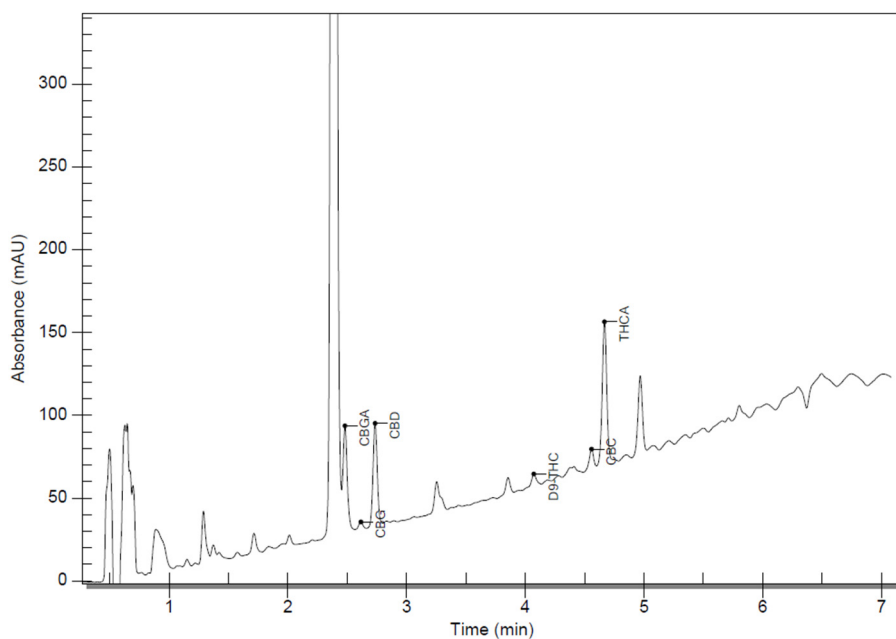

Figure S1-a: Chromatogram of S1 D300 analyzed by RP-UHPLC-PDA

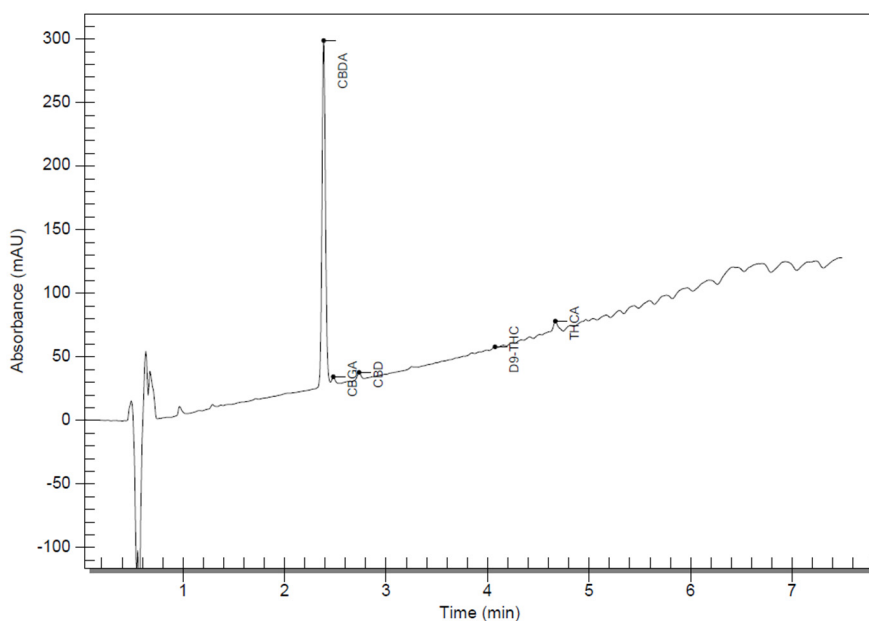

Figure S1-b: Chromatogram of S1 D3000 analyzed by RP-UHPLC-PDA

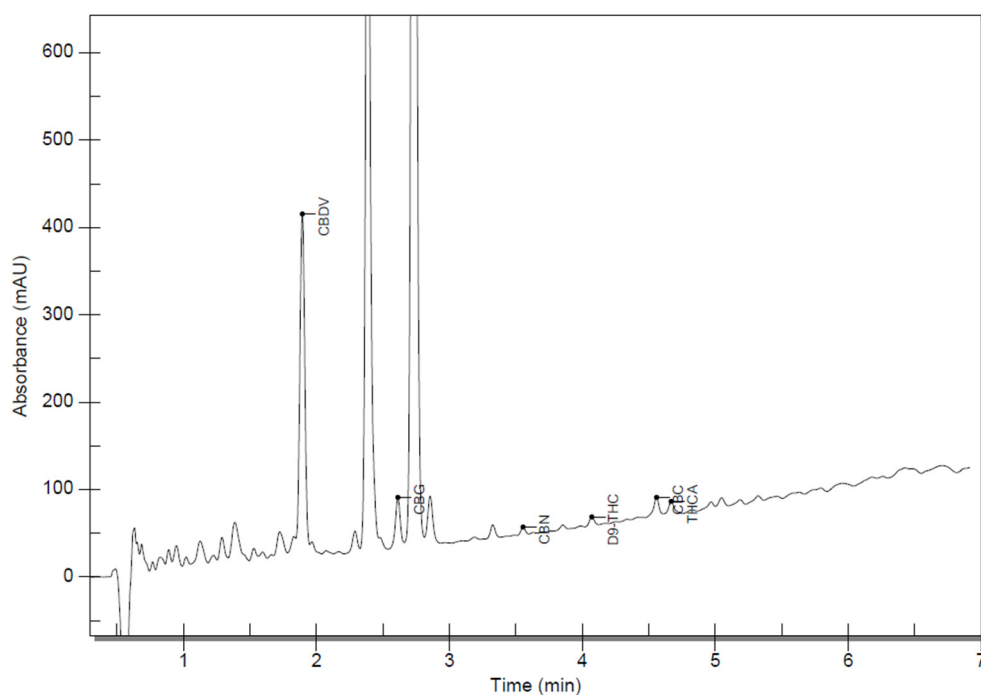

Figure S2-a: Chromatogram of S2 D300 analyzed by RP-UHPLC-PDA

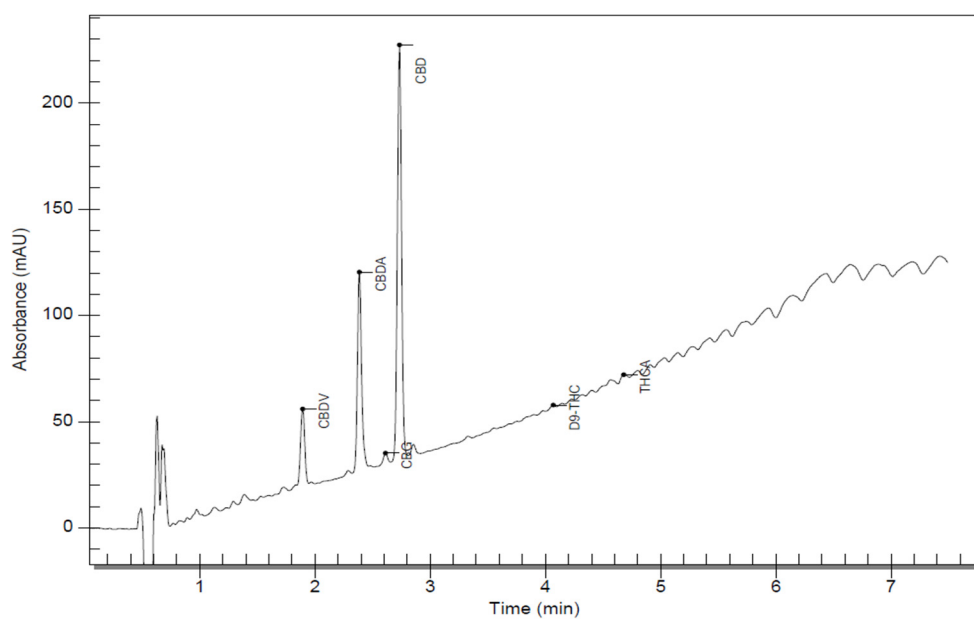

Figure S2-b: Chromatogram of S2 D3000 analyzed by RP-UHPLC-PDA

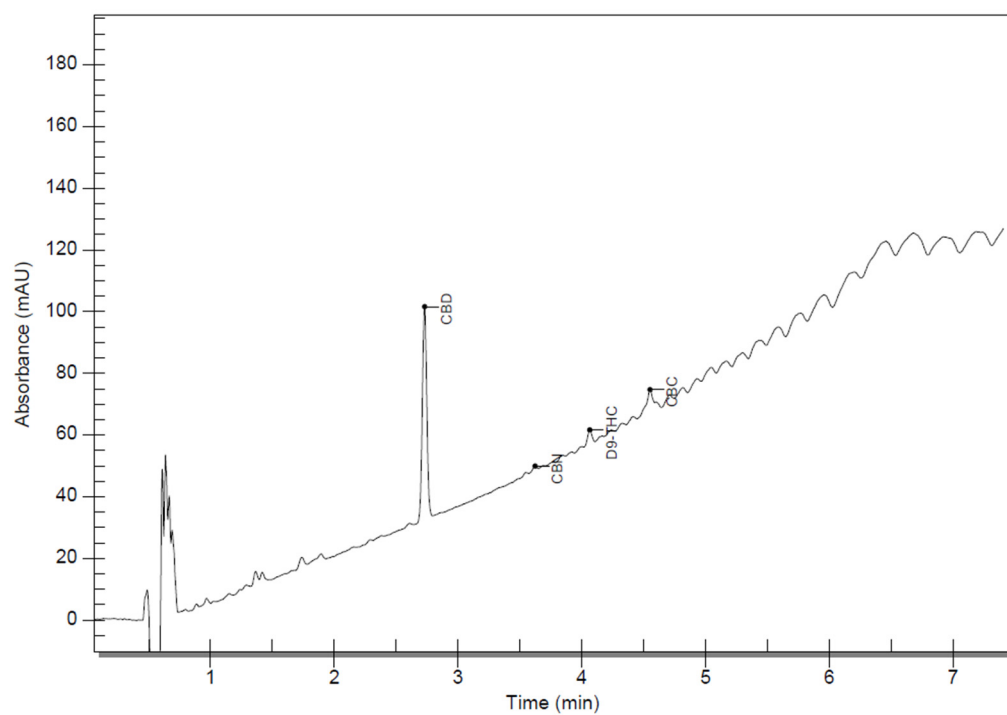

Figure S3-a: Chromatogram of S3 D300 analyzed by RP-UHPLC-PDA

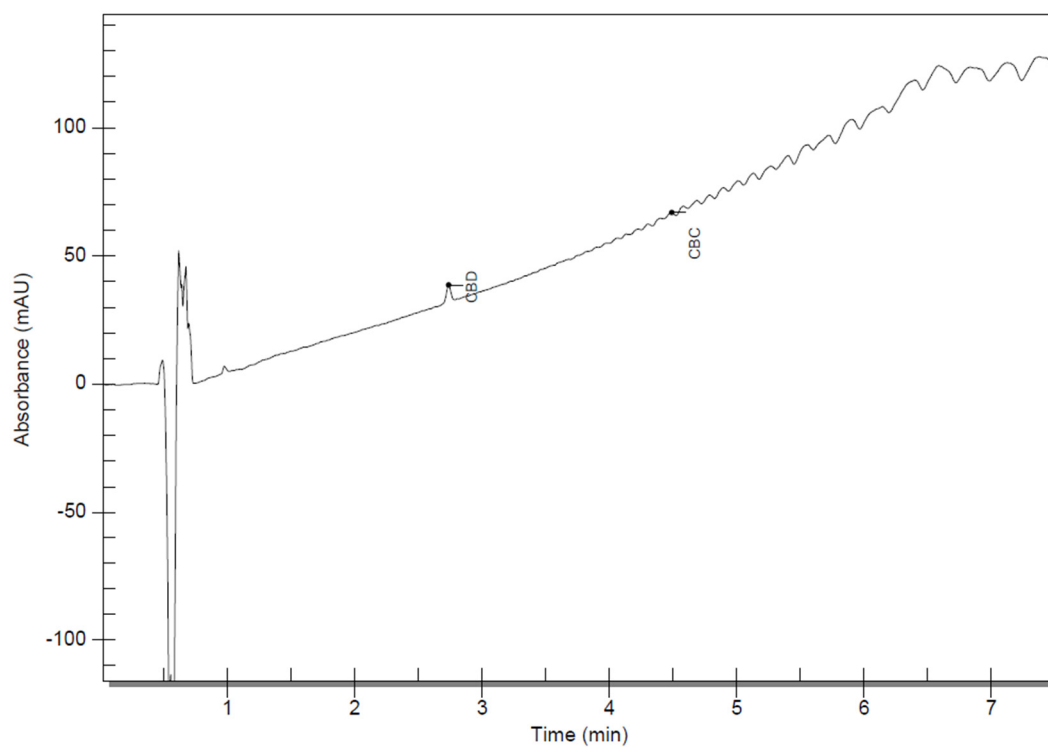

Figure S3-b: Chromatogram of S3 D3000 analyzed by RP-UHPLC-PDA

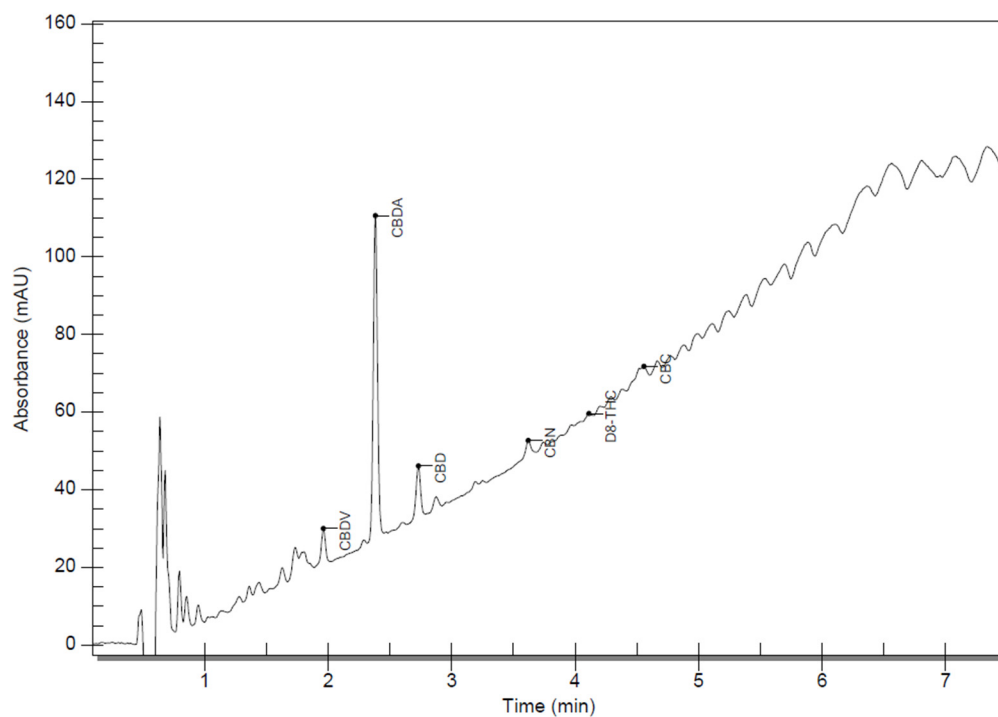

Figure S4-a Chromatogram of S4 D300 analyzed by RP-UHPLC-PDA

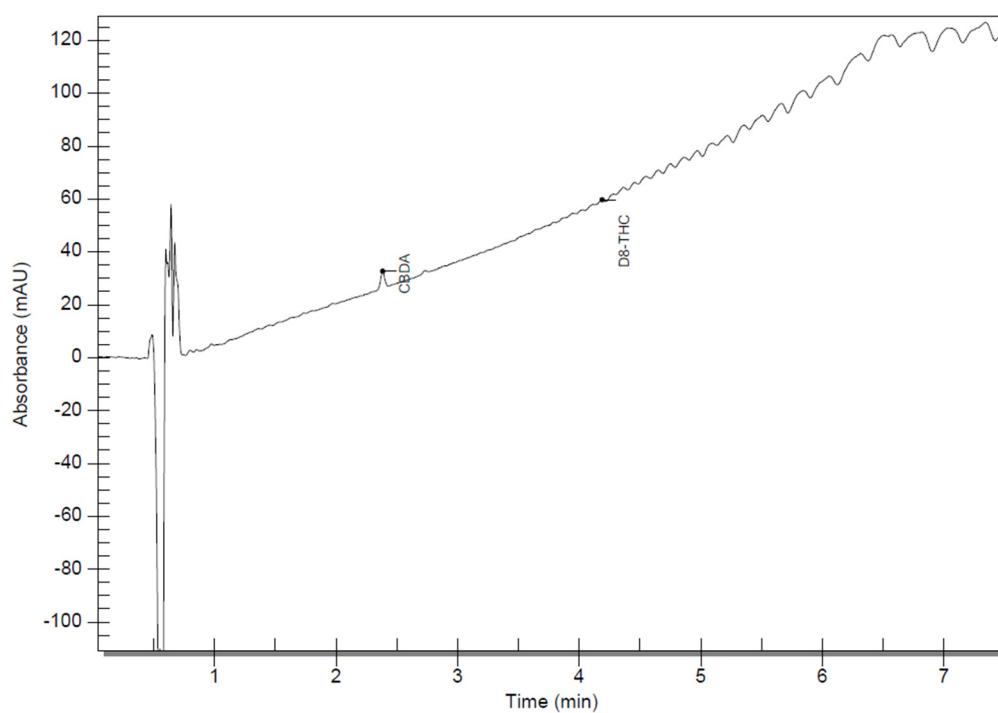

Figure S4-b: Chromatogram of S4 D3000 analyzed by RP-UHPLC-PDA

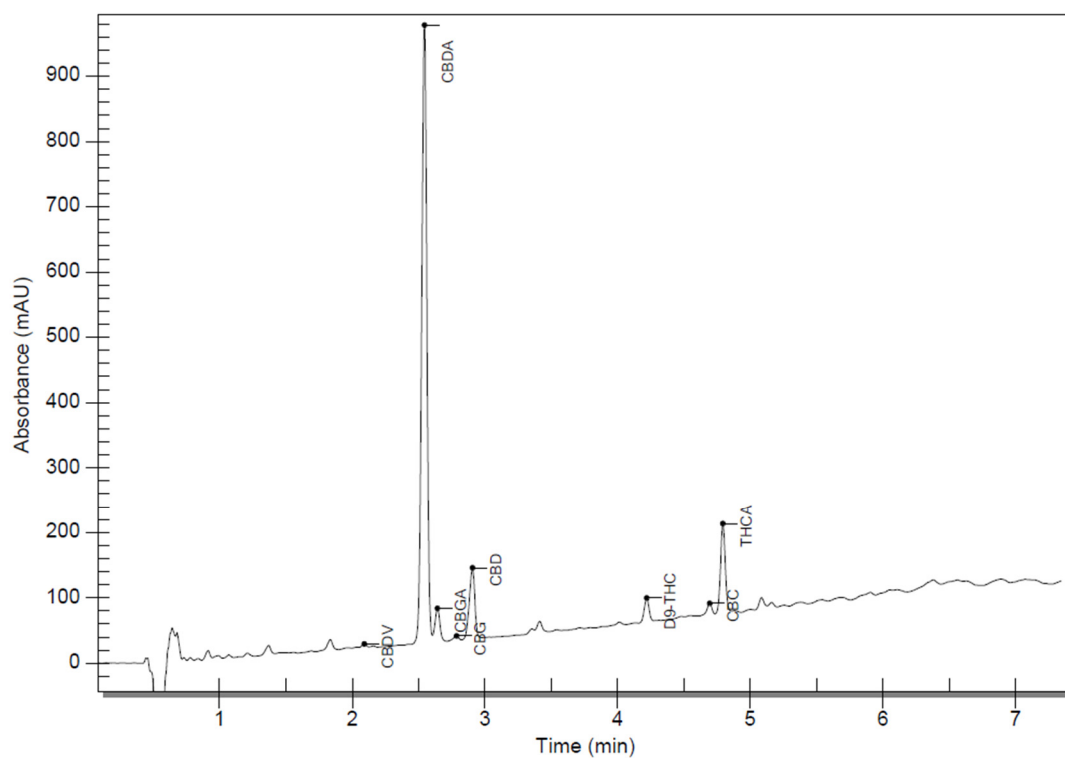

Figure S5-a: Chromatogram of S5 D300 analyzed by RP-UHPLC-PDA

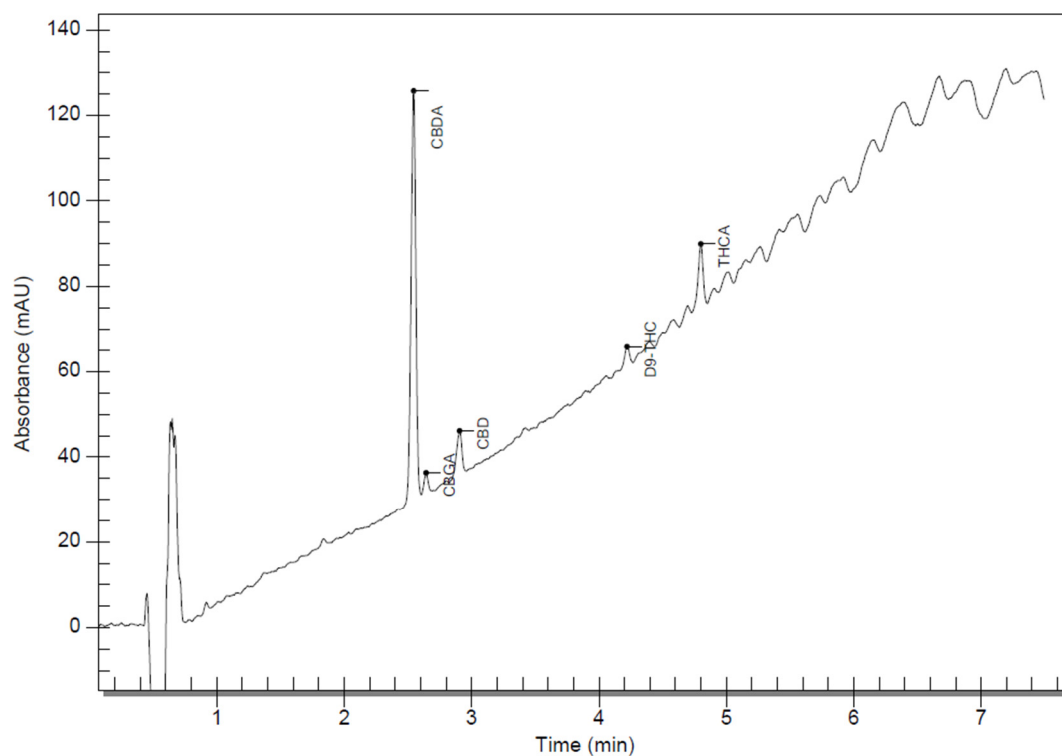

Figure S5-b: Chromatogram of S5 D3000 analyzed by RP-UHPLC-PDA

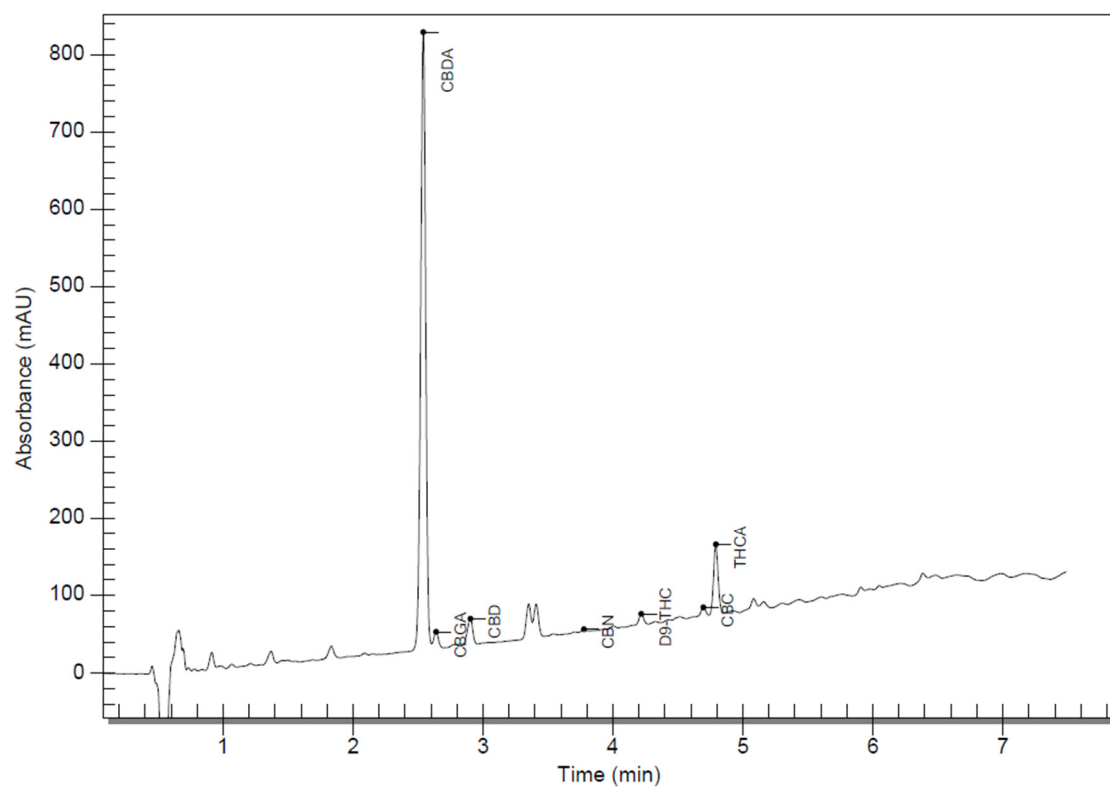

Figure S6-a: Chromatogram of S6 D300 analyzed by RP-UHPLC-PDA

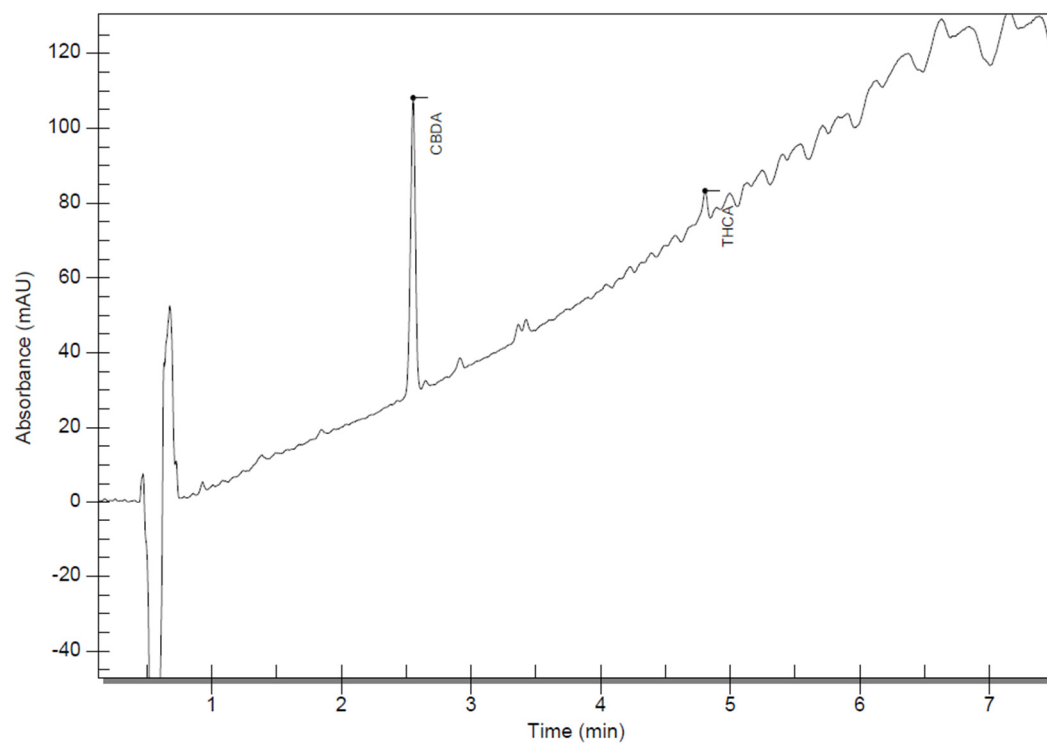

Figure S6-b: Chromatogram of S6 D3000 analyzed by RP-UHPLC-PDA

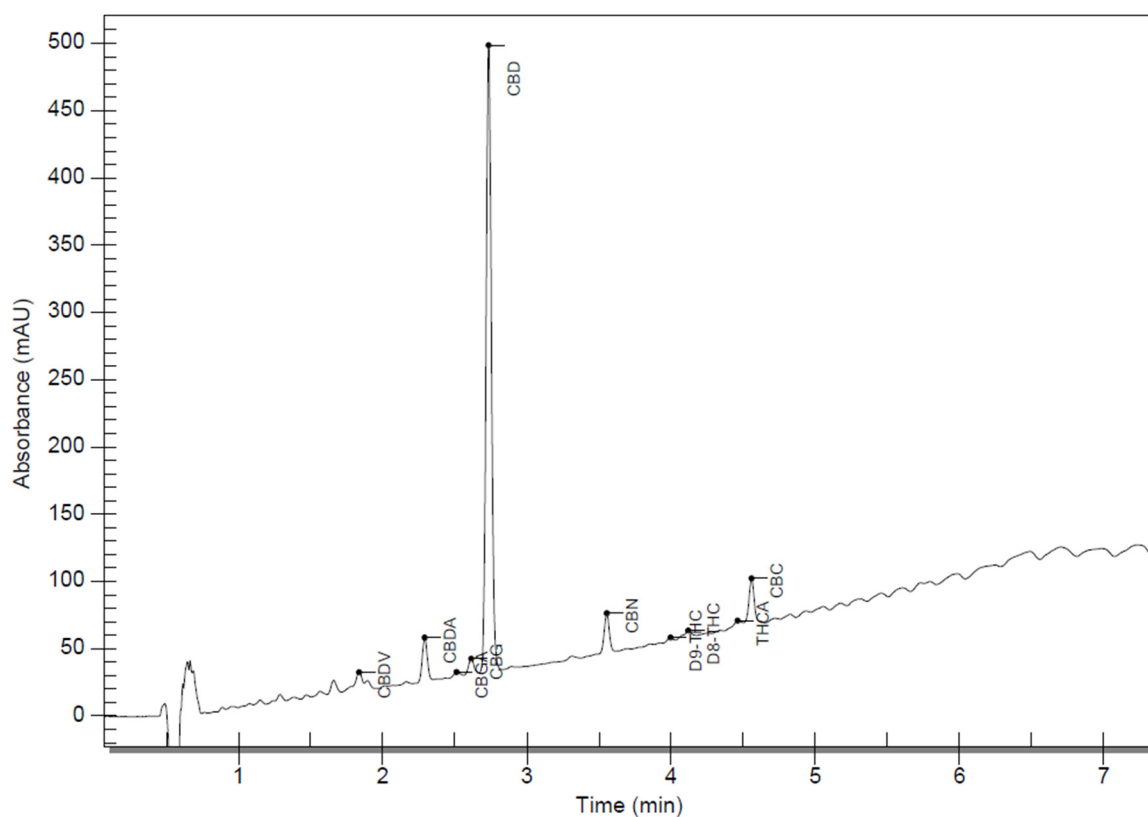

Figure S7-a: Chromatogram of S7 D3000 analyzed by RP-UHPLC-PDA

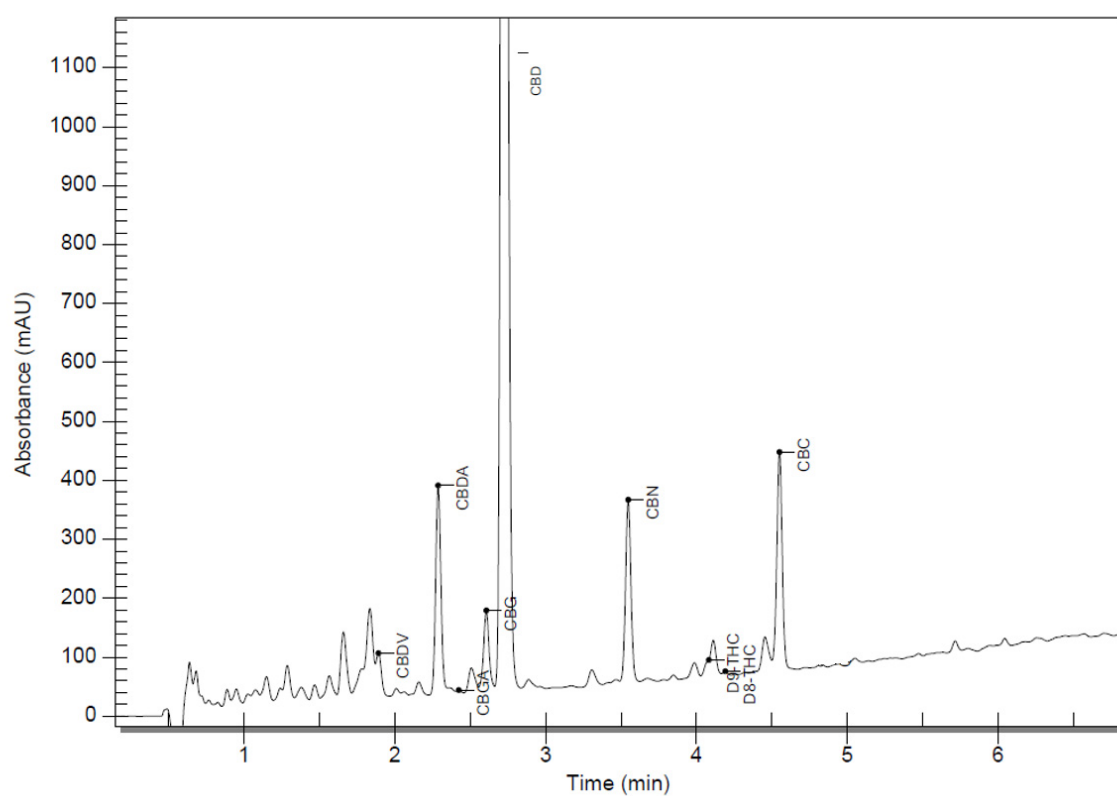

Figure S7-b; Chromatogram of S7 D300 analyzed by RP-UHPLC-PDA

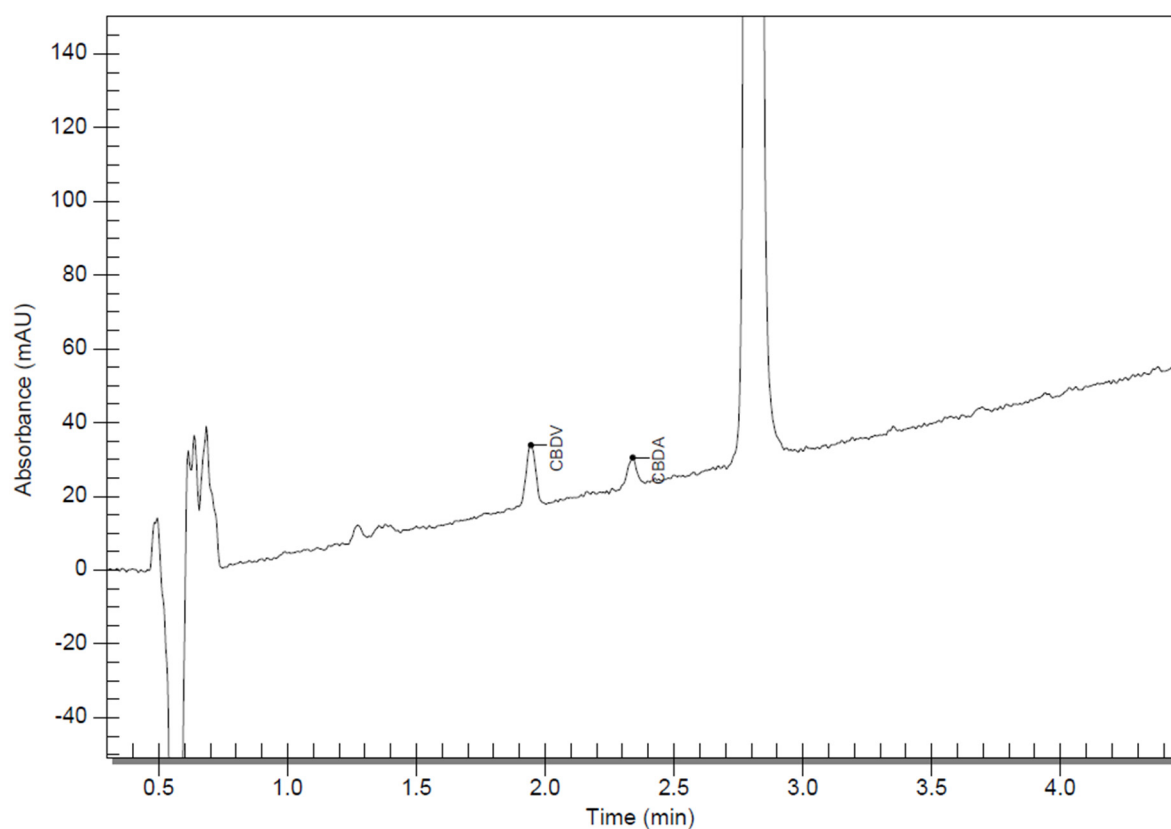

Figure S8-a: Chromatogram of S8 D300 analyzed by RP-UHPLC-PDA

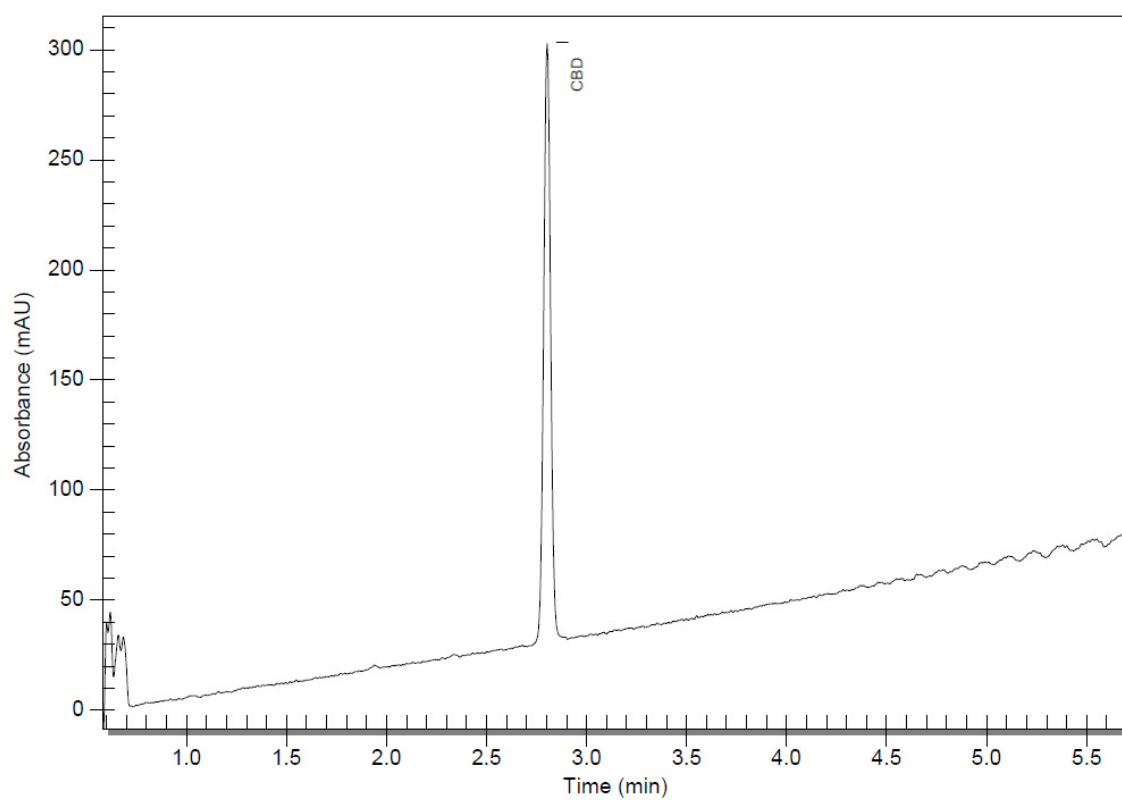

Figure S8-b: Chromatogram of S8 D3000 analyzed by RP-UHPLC-PDA

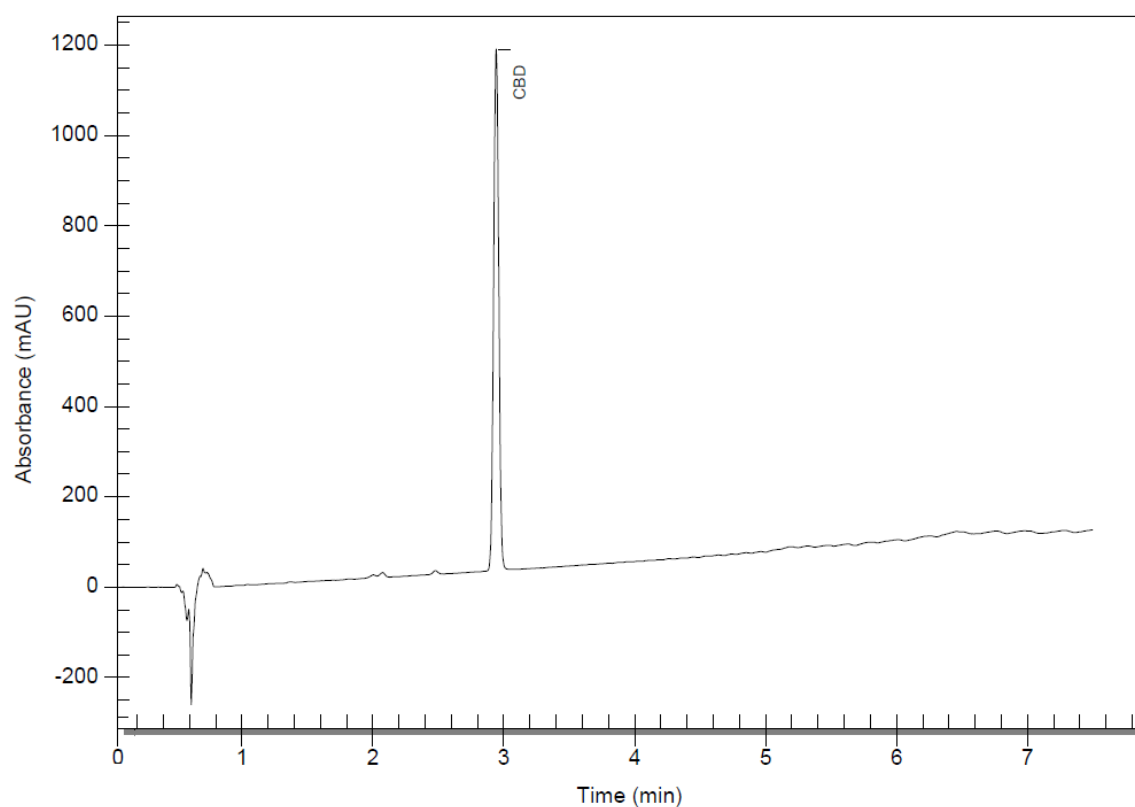

Figure S9-a: Chromatogram of S9 D300 analyzed by RP-UHPLC-PDA

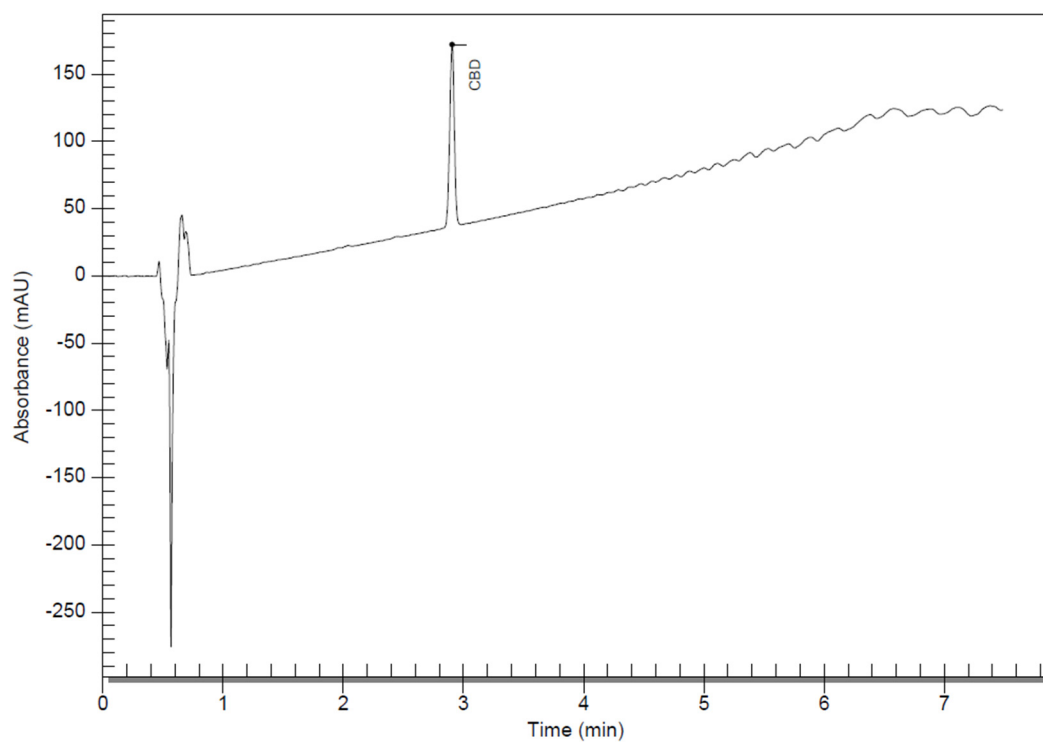

Figure S9-b: Chromatogram of S9 D3000 analyzed by RP-UHPLC-PDA
